# Supplementary figures and images for: Continuous live cell imaging using dark field microscopy
Source: Royal Society of Chemistry journal article supplement (doi:10.1039/d2ay00043a), 2022-01-01

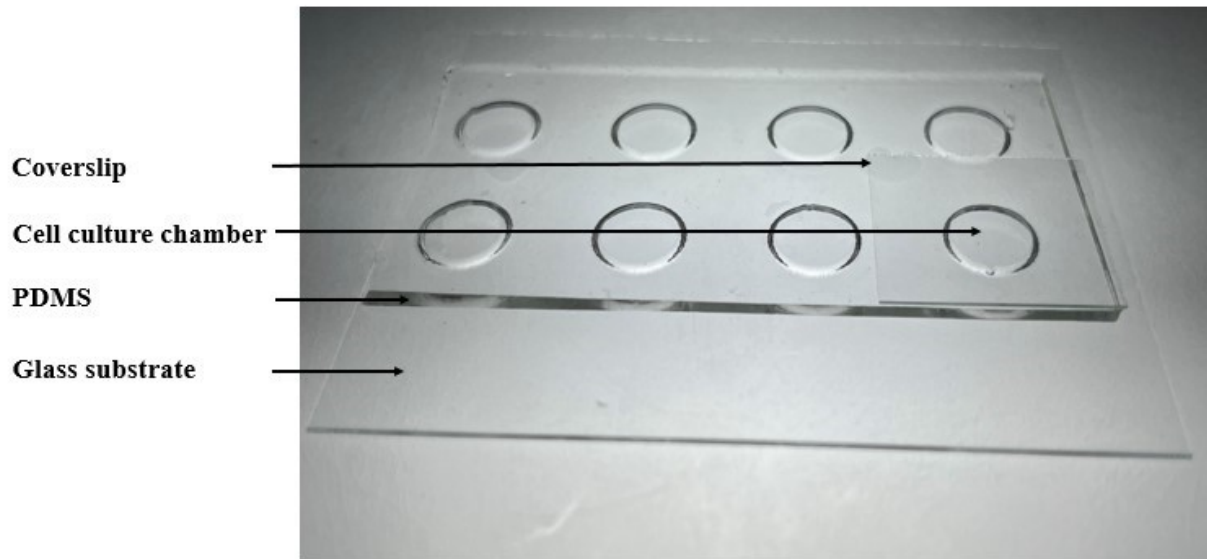

Supplement: d2ay00043a2.pdf [file d2ay00043a2.pdf]
